# Supplementary material
Source: PubMed Central journal article supplement (PMC6692879)
Supplement: jc.2018-00131.sd1.pdf [file jc.2018-00131.sd1.pdf]

## SUPPLEMENTAL MATERIALS

### The Roles of Insulin Resistance, Hyperinsulinemia, and LH in Peripubertal Obesity-Associated Hyperandrogenemia

Christine M. Burt Solorzano, Karen L. Knudsen, Amy D. Anderson, Eleanor G. Hutchens, Jessica S. Collins, James T. Patrie, John C. Marshall, Christopher R. McCartney

| <b>Table of Contents</b>                                                                                                                                                       | <b>Pages</b> |
|--------------------------------------------------------------------------------------------------------------------------------------------------------------------------------|--------------|
| Hormone assays .....                                                                                                                                                           | 2            |
| Supplemental Table 1. Effect of different methods for determining insulin sensitivity index on primary analysis .....                                                          | 3            |
| Supplemental Table 2. Effect of different methods for determining periprandial insulin levels (for use in the estimated 24-hour insulin calculation) on primary analysis ..... | 4            |
| Supplemental Table 3. Steroids before and after clamp (subject-level data) .....                                                                                               | 5            |
| Supplemental Figure 1. Acute steroid changes with the insulin clamp .....                                                                                                      | 6            |

## Hormone Assays

Characteristics of the total testosterone, SHBG, LH, and insulin assays are described in the main text.

FSH, insulin-like growth factor 1 (IGF-1), dehydroepiandrosterone sulfate, and growth hormone were measured by chemiluminescence (Immulin 2000, Siemens, Los Angeles, CA; sensitivity 0.1 IU/L, 25 ng/mL, 7 µg/dL, 0.01 ng/mL; intra-assay CVs 2.5-4.8%; inter-assay CVs 4.4-7.9%).

Estradiol, progesterone, androstenedione, and 17-hydroxyprogesterone were measured by radioimmunoassay (Siemens; sensitivities 10 pg/mL, 0.1 ng/mL, 0.1 ng/mL, and 10 ng/dL; intra-assay CVs 4.3-6.1%; inter-assay CVs 7.1-8.1%).

DHEA was measured by ELISA (ALPCO, Salem, NH; sensitivity 0.4 ng/mL; intra-assay CV 5.7%; inter-assay CV 8.0%).

Glucose levels during insulin clamp were measured by glucose oxidase method via the YSI Life Sciences 2300 glucose analyzer (Yellow Springs Instruments, Yellow Springs, OH; intra-assay and inter-assay precision <2%, limit of detection = 1 mg/dL).

Hemoglobin A1c was measured by high-performance liquid chromatography (Tosoh G7 HPLC Analyzer, Tosoh Bioscience, Inc., South San Francisco, CA; intra-assay precision 1.5% at HbA1c 7-8%; inter-assay precision 3%).

To convert metric units to SI units: 17-hydroxyprogesterone (ng/dL) x 0.030257 (pmol/L); androstenedione (ng/mL) x 3.4916 (pmol/L); dehydroepiandrosterone (ng/mL) x 3.4674 (pmol/L); dehydroepiandrosterone sulfate (µg/dL) x 27.174 (nmol/L); estradiol (pg/mL) x 3.6711 (pmol/L); glucose (mg/dL) x 0.0555 (mmol/L); growth hormone (ng/mL) x 1 (µg/L); insulin (µIU/mL) x 7.1750 (pmol/L); IGF-1 (ng/mL) x 0.1307 (nmol/L); progesterone (ng/mL) x 3.1797 (pmol/L); testosterone, total (ng/mL) x 3.4674 (pmol/L); testosterone, free (pg/mL) x 3.4674 (pmol/L).

**Supplemental Table 1. Effect of different methods for determining insulin sensitivity index (ISI) on primary analysis.** Our *a priori* primary analysis: Partial Spearman rank (nonparametric) correlation to examine the relationship between morning free T (dependent variable) and insulin sensitivity index (independent variable), controlling for estimated 24-hour LH and Tanner stage (covariates). **Panel A:** Average ISI (mean  $\pm$  SD) according to method used. **Panel B:** Correlations between ISI and testosterone (T)—while simultaneously correcting for differences in estimated 24-hour LH and Tanner stage—when using different methods for correcting ISI for subject size.

**A**

| Subject size variable used for correcting ISI    | ISI (mean $\pm$ SD) |
|--------------------------------------------------|---------------------|
| Total mass (kg)                                  | 2.23 $\pm$ 1.09     |
| Fat free mass (kg)                               | 3.57 $\pm$ 1.62     |
| Body surface area (m <sup>2</sup> ) <sup>a</sup> | 0.94 $\pm$ 0.43     |

**B**

| ISI using the following variable to correct for subject size |      | Free T (RIA)    |      | Free T (LC-MS/MS) |      | Total T (RIA)  |      | Total T (LC-MS/MS) |      |
|--------------------------------------------------------------|------|-----------------|------|-------------------|------|----------------|------|--------------------|------|
|                                                              |      | r <sub>s</sub>  | p    | r <sub>s</sub>    | p    | r <sub>s</sub> | p    | r <sub>s</sub>     | p    |
|                                                              |      | Total mass (kg) | 0.68 | 0.046             | 0.78 | 0.023          | 0.65 | 0.060              | 0.74 |
| Fat free mass (kg)                                           | 0.62 | 0.072           | 0.7  | 0.054             | 0.63 | 0.064          | 0.73 | 0.040              |      |
| Body surface area (m <sup>2</sup> ) <sup>a</sup>             | 0.70 | 0.035           | 0.79 | 0.019             | 0.70 | 0.034          | 0.80 | 0.017              |      |

Footnote: <sup>a</sup> Body surface area =  $\sqrt{(\text{height [cm]} * \text{weight [kg]}/3600)}$ .

**Supplemental Table 2. Effect of different methods for determining periprandial insulin levels (for use in the estimated 24-hour insulin calculation) on primary analysis.** Our *a priori* primary analysis: Partial Spearman rank (nonparametric) correlation to examine the relationship between morning free T (dependent variable) and insulin sensitivity index (independent variable), controlling for estimated 24-hour LH and Tanner stage (covariates). **Panel A:** Average periprandial insulin levels (mean ± SD) according to method used. **Panel B:** Correlations between estimated 24-hour insulin and testosterone (T)—while simultaneously correcting for differences in estimated 24-hour LH and Tanner stage—when using different methods for determining periprandial insulin levels (for use in the estimated 24-hour insulin calculation).

**A**

| Method of determining periprandial insulin concentration | Resulting periprandial insulin concentration (mean ± SD) |
|----------------------------------------------------------|----------------------------------------------------------|
| Mean insulin 1800-2100 h                                 | 76.1 ± 34.9                                              |
| Mean insulin 1800-2200 h                                 | 80.0 ± 38.8                                              |
| Mean insulin 1800-2300 h                                 | 75.4 ± 36.8                                              |
| Mean insulin 1900-2200 h                                 | 96.2 ± 49.1                                              |
| Mean insulin 1900-2300 h                                 | 86.5 ± 44.4                                              |

**B**

|                                                                                                   |                          | Free T (RIA) |      | Free T (LC-MS/MS) |      | Total T (RIA) |      | Total T (LC-MS/MS) |      |
|---------------------------------------------------------------------------------------------------|--------------------------|--------------|------|-------------------|------|---------------|------|--------------------|------|
|                                                                                                   |                          | $r_s$        | p    | $r_s$             | p    | $r_s$         | p    | $r_s$              | p    |
|                                                                                                   |                          |              |      |                   |      |               |      |                    |      |
| <b>Average 24-hour insulin, calculated using the following periprandial insulin concentration</b> | Mean insulin 1800-2100 h | 0.47         | 0.20 | 0.36              | 0.38 | 0.49          | 0.18 | 0.42               | 0.29 |
|                                                                                                   | Mean insulin 1800-2200 h | 0.52         | 0.18 | 0.43              | 0.34 | 0.53          | 0.18 | 0.50               | 0.25 |
|                                                                                                   | Mean insulin 1800-2300 h | 0.51         | 0.19 | 0.43              | 0.34 | 0.52          | 0.18 | 0.50               | 0.25 |
|                                                                                                   | Mean insulin 1900-2200 h | 0.51         | 0.19 | 0.43              | 0.34 | 0.52          | 0.18 | 0.50               | 0.25 |
|                                                                                                   | Mean insulin 1900-2300 h | 0.54         | 0.17 | 0.49              | 0.27 | 0.57          | 0.14 | 0.58               | 0.18 |

**Supplemental Table 3. Steroid changes with insulin clamp**

|                                | Summary data |       |        | Subject number |       |      |       |       |      |       |       |      |       |       |
|--------------------------------|--------------|-------|--------|----------------|-------|------|-------|-------|------|-------|-------|------|-------|-------|
|                                | Mean         | SD    | Median | 1              | 2     | 3    | 4     | 5     | 6    | 7     | 8     | 9    | 10    | 11    |
| 0900 h progesterone (ng/mL)    | 0.36         | 0.18  | 0.38   | 0.28           | 0.24  | 0.38 | 0.41  | 0.47  | 0.18 | 0.71  | 0.38  | 0.16 | 0.20  | 0.59  |
| 1100 h progesterone (ng/mL)    | 0.37         | 0.15  | 0.32   | 0.31           | 0.57  | 0.22 | 0.32  | 0.39  | 0.22 | 0.58  | 0.50  | 0.29 | 0.19  | 0.53  |
| 0900 h 17-OHP (ng/dL)          | 89.4         | 43.0  | 76.9   | 55.6           | 76.9  | 65.2 | 116.6 | 79.0  | 51.4 | 179.3 | 38.5  | 74.2 | 99.3  | 147.1 |
| 1100 h 17-OHP (ng/dL)          | 101.9        | 38.4  | 96.4   | 58.7           | 169.0 | 68.3 | 96.4  | 113.1 | 58.3 | 160.6 | 70.6  | 95.4 | 102.6 | 128.3 |
| 0900 h DHEA (ng/mL)            | 8.99         | 11.24 | 4.37   | 2.87           | 4.37  | 3.99 | 14.23 | 3.70  | 2.97 | 3.90  | 11.01 | 5.36 | 5.40  | 41.10 |
| 1100 h DHEA (ng/mL)            | 8.83         | 7.55  | 7.30   | 1.51           | 7.94  | 3.48 | 11.12 | 7.90  | 5.14 | 1.70  | 16.45 | 6.98 | 7.30  | 27.60 |
| 0900 h androstenedione (ng/mL) | 2.08         | 1.42  | 1.61   | 1.49           | 0.83  | 0.65 | 3.00  | 1.61  | 0.75 | 5.32  | 1.30  | 2.53 | 1.90  | 3.49  |
| 1100 h androstenedione (ng/mL) | 2.10         | 1.42  | 2.13   | 1.31           | 1.08  | 0.42 | 2.30  | 3.49  | 0.74 | 5.35  | 2.13  | 2.73 | 1.24  | 2.33  |
| 0900 h total T (ng/dL)         | 39.6         | 27.7  | 33.1   | 33.7           | 10.0  | 10.0 | 68.6  | 33.7  | 18.4 | 102.0 | 33.1  | 32.8 | 30.8  | 62.2  |
| 1100 h total T (ng/dL)         | 35.1         | 25.7  | 29.2   | 29.2           | 10.0  | 10.0 | 63.8  | 28.7  | 10.0 | 91.9  | 24.6  | 32.3 | 30.0  | 56.0  |
| 0900 h estradiol (pg/mL)       | 24.6         | 9.2   | 24.6   | 24.6           | 20.7  | 15.8 | 39.4  | 25.4  | 23.0 | 32.0  | 31.8  | 5.1  | 21.8  | 30.9  |
| 1100 h estradiol (pg/mL)       | 19.3         | 6.5   | 21.0   | 16.4           | 15.4  | 9.4  | 28.2  | 21.2  | 14.2 | 28.7  | 21.3  | 11.5 | 21.0  | 25.3  |

Abbreviations: 17OHP, 17-hydroxyprogesterone; DHEA, dehydroepiandrosterone; T, testosterone.

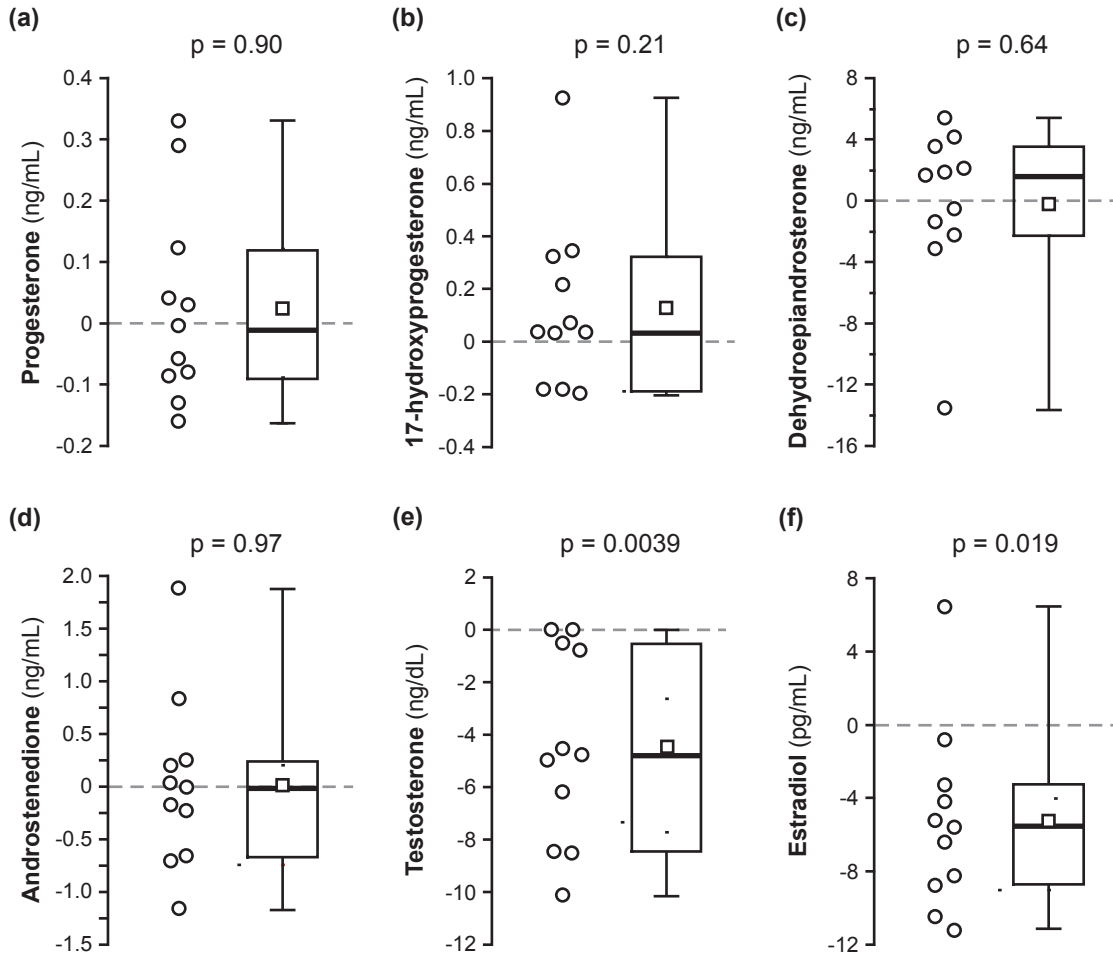

**Supplemental Figure 1. Acute steroid changes with the hyperinsulinemic-euglycemic clamp.** In each panel, the data represent the change in hormone concentration from 0900 h (at start of the hyperinsulinemic-euglycemic clamp) to 1100 h (at the end of the hyperinsulinemic-euglycemic clamp). Circles represent data from individual subjects. These data are also summarized using box-and-whisker plots, which show median (line inside the box); mean (open square); 25th and 75th percentiles (bottom and top of box); minimum and maximum (bottom and top whiskers). P values relate to changes from 0900 h to 1100 h.
